# Supplementary material for: Sociodemographic Patterns of Exclusive and Dual Combustible Tobacco and E-Cigarette Use among US Adolescents—A Nationally Representative Study (2017–2020)
Source: MDPI journal article supplement (doi:10.3390/ijerph19052965), 2022-03-03
Supplement: s1 [file s1]

Supplemental Table S1: Monitoring the Future 2017-2019 Selected Forms and Questions

| 8th & 10th grade       |                                                                                    |                                                                                                                  |                                                                                                            |                                                                                                            |
|------------------------|------------------------------------------------------------------------------------|------------------------------------------------------------------------------------------------------------------|------------------------------------------------------------------------------------------------------------|------------------------------------------------------------------------------------------------------------|
|                        |                                                                                    | 2017                                                                                                             | 2018                                                                                                       | 2019                                                                                                       |
| Cigarettes             | Form 2, 3&4                                                                        | “How frequently have you smoked cigarettes during the past 30 days?                                              | “How frequently have you smoked cigarettes during the past 30 days?                                        | “How frequently have you smoked cigarettes during the past 30 days?                                        |
| E-cigarettes           | Form 2                                                                             | During the LAST 30 DAYS, on how many days (if any) have you used an electronic vaporizer such as an e-cigarette? | On how many DAYS (if any) have you vaped NICOTINE... c) in the past 30 days?                               | On how many days (if any) have you vaped NICOTINE...in the last 30 days                                    |
|                        | Form 3&4                                                                           | During the LAST 30 DAYS, on how many days (if any) have you...vaped an e-liquid with nicotine?                   | On how many DAYS (if any) have you used an e-cigarette? c) in the past 30 days?                            |                                                                                                            |
| Cigars                 | Form 2                                                                             | During the LAST 30 DAYS, on how many days (if any) have you...smoked flavored little cigars or cigarillos?       | During the LAST 30 DAYS, on how many days (if any) have you...smoked flavored little cigars or cigarillos? | During the LAST 30 DAYS, on how many days (if any) have you...smoked flavored little cigars or cigarillos? |
|                        |                                                                                    | During the LAST 30 DAYS, on how many days (if any) have you...smoked regular little cigars or cigarillos?        | During the LAST 30 DAYS, on how many days (if any) have you...smoked regular little cigars or cigarillos?  | During the LAST 30 DAYS, on how many days (if any) have you...smoked regular little cigars or cigarillos?  |
|                        | Form 3                                                                             | During the LAST 30 DAYS, on how many days (if any) have you...smoked flavored little cigars or cigarillos?       | During the LAST 30 DAYS, on how many days (if any) have you...smoked flavored little cigars or cigarillos? | During the LAST 30 DAYS, on how many days (if any) have you...smoked flavored little cigars or cigarillos? |
|                        |                                                                                    | During the LAST 30 DAYS, on how many days (if any) have you...smoked regular little cigars or cigarillos?        | During the LAST 30 DAYS, on how many days (if any) have you...smoked regular little cigars or cigarillos?  | During the LAST 30 DAYS, on how many days (if any) have you...smoked regular little cigars or cigarillos?  |
| Form 4                 | During the LAST 30 DAYS, on how many days (if any) have you...smoked large cigars? | During the LAST 30 DAYS, on how many days (if any) have you...smoked large cigars?                               | During the LAST 30 DAYS, on how many days (if any) have you...smoked large cigars?                         |                                                                                                            |
| 12 <sup>th</sup> grade |                                                                                    |                                                                                                                  |                                                                                                            |                                                                                                            |
|                        |                                                                                    | 2017                                                                                                             | 2018                                                                                                       | 2019                                                                                                       |
| Cigarettes             | Form 2                                                                             | “How frequently have you smoked cigarettes during the past 30 days?                                              | “How frequently have you smoked cigarettes during the past 30 days?                                        | “How frequently have you smoked cigarettes during the past 30 days?                                        |
|                        | Form 4                                                                             | “How frequently have you smoked cigarettes during the past 30 days?                                              | “How frequently have you smoked cigarettes during the past 30 days?                                        | “How frequently have you smoked cigarettes during the past 30 days?                                        |
|                        | Form 5                                                                             | “How frequently have you smoked cigarettes during the past 30 days?                                              | “How frequently have you smoked cigarettes during the past 30 days?                                        |                                                                                                            |
| E-cigarettes           | Form 2                                                                             | On how many days (if any) have you vaped NICOTINE...during the last 30 days                                      | On how many days (if any) have you vaped NICOTINE...during the last 30 days                                | On how many days (if any) have you vaped NICOTINE...during the last 30 days                                |
|                        | Form 4                                                                             | On how many days (if any) have you vaped NICOTINE...during the last 30 days                                      | On how many days (if any) have you vaped NICOTINE...during the last 30 days                                | On how many days (if any) have you vaped NICOTINE...during the last 30 days                                |
|                        | Form 5                                                                             | On how many occasions (if any) have you vaped NICOTINE...during the last 30 days                                 | On how many occasions (if any) have you vaped NICOTINE...during the last 30 days                           |                                                                                                            |
| Cigars                 | Form 2                                                                             | During the LAST 30 DAYS, on how many days (if any) have you...smoked flavored little cigars or cigarillos?       | During the LAST 30 DAYS, on how many days (if any) have you...smoked flavored little cigars or cigarillos? | During the LAST 30 DAYS, on how many days (if any) have you...smoked flavored little cigars or cigarillos? |

|  |        |                                                                                                                                                                                                                                    |                                                                                                                                                                                                                                    |                                                                                                                                                                                                                                                                                                                              |
|--|--------|------------------------------------------------------------------------------------------------------------------------------------------------------------------------------------------------------------------------------------|------------------------------------------------------------------------------------------------------------------------------------------------------------------------------------------------------------------------------------|------------------------------------------------------------------------------------------------------------------------------------------------------------------------------------------------------------------------------------------------------------------------------------------------------------------------------|
|  |        | <p>During the LAST 30 DAYS, on how many days (if any) have you...smoked regular little cigars or cigarillos?</p> <p>During the LAST 30 DAYS, on how many days (if any) have you...smoked large cigars?</p>                         | <p>During the LAST 30 DAYS, on how many days (if any) have you...smoked regular little cigars or cigarillos?</p> <p>During the LAST 30 DAYS, on how many days (if any) have you...smoked large cigars?</p>                         | <p>During the LAST 30 DAYS, on how many days (if any) have you...smoked regular little cigars or cigarillos?</p> <p>During the LAST 30 DAYS, on how many days (if any) have you...smoked large cigars?</p>                                                                                                                   |
|  | Form 4 | <p>During the LAST 30 DAYS, on how many days (if any) have you...smoked flavored little cigars or cigarillos?</p> <p>During the LAST 30 DAYS, on how many days (if any) have you...smoked regular little cigars or cigarillos?</p> | <p>During the LAST 30 DAYS, on how many days (if any) have you...smoked flavored little cigars or cigarillos?</p> <p>During the LAST 30 DAYS, on how many days (if any) have you...smoked regular little cigars or cigarillos?</p> | <p>During the LAST 30 DAYS, on how many days (if any) have you...smoked flavored little cigars or cigarillos?</p> <p>During the LAST 30 DAYS, on how many days (if any) have you...smoked regular little cigars or cigarillos?</p> <p>During the LAST 30 DAYS, on how many days (if any) have you...smoked large cigars?</p> |
|  | Form 5 | <p>During the LAST 30 DAYS, on how many days (if any) have you...smoked large cigars?</p>                                                                                                                                          | <p>During the LAST 30 DAYS, on how many days (if any) have you...smoked large cigars?</p>                                                                                                                                          | <p>During the LAST 30 DAYS, on how many days (if any) have you...smoked large cigars?</p>                                                                                                                                                                                                                                    |
